# Supplementary material for: On the Etching Mechanism of Highly Hydrogenated SiN Films by CF4/D2 Plasma: Comparison with CF4/H2
Source: MDPI journal article supplement (doi:10.3390/coatings11121535), 2021-12-14
Supplement: s1 [file s1]

# Supplementary Materials: On the etching mechanism of highly-hydrogenated SiN films by CF<sub>4</sub>/D<sub>2</sub> plasma: comparison with CF<sub>4</sub>/H<sub>2</sub>

Shih-Nan Hsiao \*, Thi-Thuy-Nga Nguyen, Takayoshi Tsutsumi, Kenji Ishikawa, Makoto Sekine, and Masaru Hori

Center for Low-temperature Plasma Sciences, Nagoya University, Nagoya, 464-8603, Japan

\* Correspondence: hsiao@plasma.engg.nagoya-u.ac.jp

The Figure S1 shows the surface morphology of the samples (a) before etching, after etching with (b) the CF<sub>4</sub>/D<sub>2</sub> and (c) CF<sub>4</sub>/H<sub>2</sub> plasma at 20 °C. For the pristine SiN film, the root-mean-square surface roughness ( $R_{\text{rms}}$ ) was obtained to be approximately 0.85 nm. Upon exposure of the CF<sub>4</sub>/D<sub>2</sub> plasma, the amount of  $R_{\text{rms}}$  decreased to 0.28 nm; on the contrary, for the CF<sub>4</sub>/H<sub>2</sub> plasma, the  $R_{\text{rms}}$  increased very slightly to 0.94 nm. The decrease of the  $R_{\text{rms}}$  for the CF<sub>4</sub>/D<sub>2</sub> may be associated with a well-balance between the surface passivation from the FC layer deposition that alleviates plasma damage to the SiN substrate, and the remove of the deposited FC layer by reactive ion sputtering.

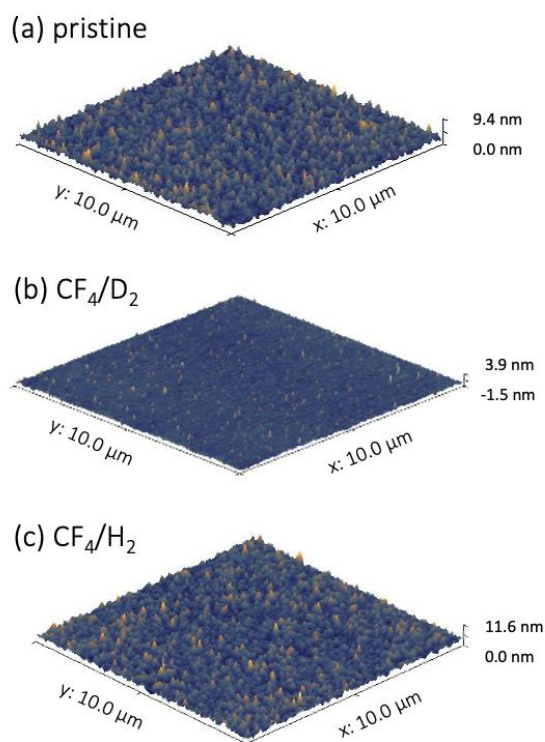

**Figure S1.** Surface roughness of the samples (a) before etching and after etching with the (b) CF<sub>4</sub>/D<sub>2</sub> and (c) CF<sub>4</sub>/H<sub>2</sub> plasma at substrate temperature of 20 °C.
