# Supplementary material for: On the Etching Mechanism of Highly Hydrogenated SiN Films by CF4/D2 Plasma: Comparison with CF4/H2
Source: MDPI journal article supplement (doi:10.3390/coatings11121535), 2021-12-14
Supplement: s1 [file s1]

Archive with 1 entries (1 files):
- coatings-1490648-supplementary.pdf
